# Supplementary material for: “In Less than No Time”: Feasibility of Rotational Thromboelastometry to Detect Anticoagulant Drugs Activity and to Guide Reversal Therapy
Source: MDPI journal article supplement (doi:10.3390/jcm11051407), 2022-03-04
Supplement: s1 [file s1]

| Study             | Type of study/<br>ROTEM | N. patients               | Type of drug                                        | INTEM-CT                  | INTEM-CFT                 | INTEM-MCF                   | EXTEM-CT                  | EXTEM-CFT                  | EXTEM-MCF                | NATEM-CT                | NATEM-CFT             | NATEM-MCF                    | ECATEM-CT                       | ECATEM-CFT                    | ECATEM-M-MCF                |
|-------------------|-------------------------|---------------------------|-----------------------------------------------------|---------------------------|---------------------------|-----------------------------|---------------------------|----------------------------|--------------------------|-------------------------|-----------------------|------------------------------|---------------------------------|-------------------------------|-----------------------------|
| Tsantes [138]     | In vivo/<br>NATEM       | 20 NVAf vs<br>20 controls | Dabigatran (110 mg b.i.d)                           | N/A                       | N/A                       | N/A                         | N/A                       | N/A                        | N/A                      | 1000±362 vs<br>499±116* | 290±268 vs<br>133±32§ | 60.3±12.8 vs<br>58.8±4.0 N/S | N/A                             | N/A                           | N/A                         |
|                   |                         | 20 NVAf vs<br>20 controls | Rivaroxaban (20 mg)                                 | N/A                       | N/A                       | N/A                         | N/A                       | N/A                        | N/A                      | 916±414 vs<br>499±116 * | 310±265 vs<br>133±31* | 59.9±6.2 vs<br>58.8±4.0 N/S  | N/A                             | N/A                           | N/A                         |
| Vedovati [139]    | In vivo/<br>ROTEM gamma | 10 NVAf vs<br>15 controls | Dabigatran (trough sample, 1 hour before after OA)  | N/A                       | N/A                       | N/A                         | N/A                       | N/A                        | N/A                      | N/A                     | N/A                   | N/A                          | 201.2±64.1 vs<br>99.4±14.1*     | 74.6±23.1 vs<br>79.0±18.4 N/S | 68.8±6.1 vs<br>64.7±4.6 §   |
|                   |                         |                           | Dabigatran (peak sample, 2-3 hours after OA)        | N/A                       | N/A                       | N/A                         | N/A                       | N/A                        | N/A                      | N/A                     | N/A                   | N/A                          | 246.8±88.9 vs<br>99.4±14.1*     | 77.6±14.6 vs<br>79.0±18.4 N/S | 69.1±5.5 vs<br>64.7±4.6 §   |
|                   |                         | 10 NVAf vs<br>15 controls | Apixaban (trough sample, 1 hour before after OA)    | N/A                       | N/A                       | N/A                         | N/A                       | N/A                        | N/A                      | N/A                     | N/A                   | N/A                          | 262.7 vs<br>119 vs<br>138±37.3# | 104.2±47 vs<br>78±16.1§       | 64.5±6.6 vs<br>61.4±4.2 N/S |
|                   |                         |                           | Apixaban (peak sample, 2-3 hours after OA)          | N/A                       | N/A                       | N/A                         | N/A                       | N/A                        | N/A                      | N/A                     | N/A                   | N/A                          | 303.3±86.5 vs<br>138±37.3*      | 133.4±93.4 vs<br>78±16.1§     | 64.4±6.9 vs<br>61.4±4.2 N/S |
|                   |                         | 10 NVAf vs<br>15 controls | Rivaroxaban (trough sample, 1 hour before after OA) | N/A                       | N/A                       | N/A                         | N/A                       | N/A                        | N/A                      | N/A                     | N/A                   | N/A                          | 243.2±36.2 vs<br>138±37.7*      | 106.6±80 vs<br>78±16.1 N/S    | 68.5±6.2 vs<br>61.4±4.2 N/S |
|                   |                         |                           | Rivaroxaban (peak sample, 2-3 hours after OA)       | N/A                       | N/A                       | N/A                         | N/A                       | N/A                        | N/A                      | N/A                     | N/A                   | N/A                          | 482.7±157.6 vs<br>138±37.7#     | 119.8±56 vs<br>78±16.1 N/S    | 66.1±9.1 vs<br>61.4±4.2 N/S |
| Korpallo va [140] | In vivo/<br>ROTEM gamma | 45 NVAf vs controls       | Rivaroxaban (20 mg) (trough sample)                 | 164.5±4.8 vs<br>53.4±5.8° | 59±4.6 vs<br>84.1±4.3§    | 66.2±1.7 vs<br>60.9±3.7 N/S | 101.9±8.3 vs<br>55.3±6.5° | 66±7.2 vs<br>80±23.8 N/S   | 68.4±1.8 vs<br>63.5±4.2§ | N/A                     | N/A                   | N/A                          | N/A                             | N/A                           | N/A                         |
|                   |                         |                           | Rivaroxaban (20 mg) (peak sample)                   | 221.3±6.4 vs<br>53.4±5.8° | 58.8±3.5 vs<br>84.1 ±4.3# | 66.9 ±1.7 vs<br>60.9±3 N/S  | 191.8±22.9 vs             | 68.3±2.7 vs<br>80±23.8 N/S | 68.8±1.3 vs<br>63.5±4.2# | N/A                     | N/A                   | N/A                          | N/A                             | N/A                           | N/A                         |

|                      |                            |                                           |                                                                                                 |                                                                                                                            |                                                                                                                                  |                                                                                                                                                          |                                                                                                                                          |                                                                                                                                    |                                                                                                                                 |                |                |                |                |                |                |
|----------------------|----------------------------|-------------------------------------------|-------------------------------------------------------------------------------------------------|----------------------------------------------------------------------------------------------------------------------------|----------------------------------------------------------------------------------------------------------------------------------|----------------------------------------------------------------------------------------------------------------------------------------------------------|------------------------------------------------------------------------------------------------------------------------------------------|------------------------------------------------------------------------------------------------------------------------------------|---------------------------------------------------------------------------------------------------------------------------------|----------------|----------------|----------------|----------------|----------------|----------------|
|                      |                            |                                           | sample)                                                                                         |                                                                                                                            |                                                                                                                                  | N/S                                                                                                                                                      | 55.3±6.5°                                                                                                                                |                                                                                                                                    |                                                                                                                                 |                |                |                |                |                |                |
| Korpallo<br>va [140] | In vivo/<br>ROTEM<br>gamma | 45 NVAF<br>vs controls                    | Apixaban (5<br>mg b.i.d)<br>(trough<br>sample)<br><br>Apixaban (5<br>mg b.i.d)<br>(peak sample) | 176.6±4.9 vs<br>53.4±5.8°<br><br>193.2±9.1 vs<br>53.4±5.8°                                                                 | 66.9 ±3.3 vs<br>84.1±4.3 N/S<br><br>65.1±1.4 vs<br>84.1±4.3 N/S                                                                  | 63.6±1.1<br>vs<br>60.9±3.7<br>N/S<br><br>65.4±1.4<br>vs<br>60.9±3.7<br>N/S                                                                               | 103±4.9 vs<br>55.3±6.5 °<br><br>69.9±5.1 vs<br>80±23.8<br>N/S                                                                            | 68.4±3 vs<br>80±23.8 N/S<br><br>69.9±5.1 vs<br>80±23.3 N/S                                                                         | 66.6±1.1 vs<br>63.5±4.2 N/S<br><br>68± 1.3 vs<br>63.5±4.2§                                                                      | N/A<br><br>N/A | N/A<br><br>N/A | N/A<br><br>N/A | N/A<br><br>N/A | N/A<br><br>N/A | N/A<br><br>N/A |
| Taune<br>[143]       | Ex vivo                    | 30 NVAF                                   | Dabigatran<br>(150 mg b.i.d)                                                                    | Correlation<br>with plasma<br>concentration<br>(r=0.73)#                                                                   | N/A                                                                                                                              | N/A                                                                                                                                                      | Correlation<br>with<br>plasma<br>concentrati<br>on<br>(r=0.92)#                                                                          | N/A                                                                                                                                | N/A                                                                                                                             | N/A            | N/A            | N/A            | N/A            | N/A            | N/A            |
| Herrman<br>n [144]   | In vivo                    | 17 NVAF                                   | Dabigatran<br>(150 mg b.i.d)                                                                    | Correlation<br>with plasma<br>concentration<br>(r=0.679)#                                                                  | N/A                                                                                                                              | N/A                                                                                                                                                      | Correlation<br>with<br>plasma<br>concentrati<br>on<br>(r=0.838)°                                                                         | N/A                                                                                                                                | N/A                                                                                                                             | N/A            | N/A            | N/A            | N/A            | N/A            | N/A            |
| Herrman<br>n [144]   | In vivo                    | 15 NVAF                                   | Rivaroxaban<br>(10 mg)                                                                          | Correlation<br>with plasma<br>concentration<br>(r=0.128) N/S                                                               | N/A                                                                                                                              | N/S                                                                                                                                                      | Correlation<br>with<br>plasma<br>concentrati<br>on<br>(r=0.164)<br>N/S                                                                   | N/A                                                                                                                                | N/A                                                                                                                             | N/A            | N/A            | N/A            | N/A            | N/A            | N/A            |
| Klages<br>[145]      | Ex<br>vivo                 | 16 NVAF/<br>VTE<br><br>16<br>NVAF/VT<br>E | Dabigatran<br><br>Rivaroxaban                                                                   | Correlation<br>with plasma<br>concentration<br>(r=0.792)°<br><br>Correlation<br>with plasma<br>concentration<br>(r=0.689)° | Correlation<br>with plasma<br>concentration<br>(r=0.051) N/S<br><br>Correlation<br>with plasma<br>concentration<br>(r=0.022) N/S | Correlati<br>on with<br>plasma<br>concentra<br>tion<br>(r=0.192)<br>N/S<br><br>Correlati<br>on with<br>plasma<br>concentra<br>tion (r=-<br>0.063)<br>N/S | Correlation<br>with<br>plasma<br>concentrati<br>on<br>(r=0.765)°<br><br>Correlation<br>with<br>plasma<br>concentrati<br>on<br>(r=0.595)* | Correlation with<br>plasma<br>concentration<br>(r=-0.083) N/S<br><br>Correlation with<br>plasma<br>concentration<br>(r=-0.008) N/S | Correlation with<br>plasma<br>concentration<br>(r= 0.354)§<br><br>Correlation with<br>plasma<br>concentration<br>(r=-0.013) N/S | N/A<br><br>N/A | N/A<br><br>N/A | N/A<br><br>N/A | N/A<br><br>N/A | N/A<br><br>N/A | N/A<br><br>N/A |
| Comuth<br>[146]      | Ex vivo                    | 15 NVAF                                   | Dabigatran<br>(8 patients<br>150 mg b.i.d<br>and 7 patients                                     | Correlation<br>with plasma<br>concentration<br>(R <sup>2</sup> = 0.92)#                                                    | N/A                                                                                                                              | Correlati<br>on with<br>plasma<br>concentra                                                                                                              | Correlation<br>with<br>plasma<br>concentrati                                                                                             | N/A                                                                                                                                | Correlation with<br>plasma<br>concentration<br>(R <sup>2</sup> = 0.01) N/S                                                      | N/A            | N/A            | N/A            | N/A            | N/A            | N/A            |

|              |                     |                              |                                                       |                                                                                                                                                                                                                                  |                                                        |                                                       |                                                                                                                                                                                                                                        |                                                     |                                                       |     |     |     |                                                                                                                                                                                                                               |     |     |
|--------------|---------------------|------------------------------|-------------------------------------------------------|----------------------------------------------------------------------------------------------------------------------------------------------------------------------------------------------------------------------------------|--------------------------------------------------------|-------------------------------------------------------|----------------------------------------------------------------------------------------------------------------------------------------------------------------------------------------------------------------------------------------|-----------------------------------------------------|-------------------------------------------------------|-----|-----|-----|-------------------------------------------------------------------------------------------------------------------------------------------------------------------------------------------------------------------------------|-----|-----|
|              | In vitro            | 10 healthy volunteers        | 110 mg b.i.d)<br>Dabigatran                           | Correlation with plasma concentration ( $R^2=0.98$ )°                                                                                                                                                                            | N/A                                                    | Correlation with plasma concentration ( $R^2=0.75$ )# | Correlation with plasma concentration ( $R^2=0.97$ )°                                                                                                                                                                                  | N/A                                                 | Correlation with plasma concentration ( $R^2=0.75$ )# | N/A | N/A | N/A | N/A                                                                                                                                                                                                                           | N/A | N/A |
| Sokol [147]  | In vivo/ROTEM gamma | 27 NVAf                      | Dabigatran (150 mg b.i.d, before vs 2 hours after OA) | Correlation with plasma concentration ( $r=0.84$ )°                                                                                                                                                                              | Correlation with plasma concentration ( $r=0.23$ ) N/S | Correlation with plasma concentration ( $r=-0.92$ )°  | Correlation with plasma concentration ( $r=0.92$ )°                                                                                                                                                                                    | Correlation with plasma concentration ( $r=0.89$ )° | Correlation with plasma concentration ( $r=-0.93$ )°  | N/A | N/A | N/A | N/A                                                                                                                                                                                                                           | N/A | N/A |
| Korber [148] | Ex vivo/ECATE M     | 10 hip and knee arthroplasty | Dabigatran (110 mg b.i.d.)                            | Correlation with plasma concentration 2 hours after OA ( $r=0.88$ )*<br><br>Correlation with plasma concentration 6 hours after OA ( $r=0.53$ ) N/S<br><br>Correlation with plasma concentration 12 hours after OA ( $r=0.83$ )# | N/A                                                    | N/A                                                   | Correlation with plasma concentration 2 hours after OA ( $r=0.69$ ) N/S<br><br>Correlation with plasma concentration 6 hours after OA ( $r=0.54$ ) N/S<br><br>Correlation with plasma concentration 12 hours after OA ( $r=0.50$ ) N/S | N/A                                                 | N/A                                                   | N/A | N/A | N/A | Correlation with plasma concentration 2 hours after OA ( $r=0.90$ )*<br><br>Correlation with plasma concentration 6 hours after OA ( $r=0.77$ )#<br><br>Correlation with plasma concentration 12 hours after OA ( $r=0.85$ )# | N/A | N/A |

|                |                                            |                          |                                        |                           |     |     |                                         |     |     |                     |                    |                        |                                                                                  |     |     |
|----------------|--------------------------------------------|--------------------------|----------------------------------------|---------------------------|-----|-----|-----------------------------------------|-----|-----|---------------------|--------------------|------------------------|----------------------------------------------------------------------------------|-----|-----|
| Schäfer [149]  | In vitro/<br>ROTEM<br>delta-<br>ECATE<br>M | 10 healthy<br>volunteers | Dabigatran                             | N/A                       | N/A | N/A | N/A                                     | N/A | N/A | N/A                 | N/A                | N/A                    | High<br>correlation<br>with spiked<br>blood<br>concentrati<br>ons<br>(r=0.9985)* | N/A | N/A |
|                |                                            |                          | Rivaroxaban                            | N/A                       | N/A | N/A | N/A                                     | N/A | N/A | N/A                 | N/A                | N/A                    | N/S                                                                              | N/A | N/A |
| Seyve [151]    | In vitro/<br>ROTEM<br>delta                | 20 healthy<br>volunteers | Apixaban (n. 5 patients)               | >1200 ng/mL for double    | N/A | N/S | 1042±225 ng/mL for double               | N/A | N/S | N/A                 | N/A                | N/A                    | N/A                                                                              | N/A | N/A |
|                |                                            |                          | Edoxaban (n. 5 patients)               | 715±134 ng/mL for double  | N/A | N/S | 134±38 ng/mL for double                 | N/A | N/S | N/A                 | N/A                | N/A                    | N/A                                                                              | N/A | N/A |
|                |                                            |                          | Rivaroxaban (n. 5 patients)            | 1088±114 ng/mL for double | N/A | N/S | 176±26 ng/mL for double                 | N/A | N/S | N/A                 | N/A                | N/A                    | N/A                                                                              | N/A | N/A |
|                |                                            |                          | Dabigatran (n. 5 patients)             | 449±94 ng/mL for double   | N/A | N/S | 284±73 ng/mL for double                 | N/A | N/S | N/A                 | N/A                | N/A                    | N/A                                                                              | N/A | N/A |
| Mahamad [152]  | In vivo/<br>ROTEM<br>delta                 | 12 bleeding<br>patients  | Dabigatran (n.1 patient)               | N/A                       | N/A | N/A | N/A                                     | N/A | N/A | N/A                 | N/A                | N/A                    | N/A                                                                              | N/A | N/A |
|                |                                            |                          | Rivaroxaban (n.3 patients)             | N/A                       | N/A | N/A | Correlation with PT value (r=0.86) N/S  | N/A | N/A | N/A                 | N/A                | N/A                    | N/A                                                                              | N/A | N/A |
|                |                                            |                          | Apixaban (n.8 patients)                | N/A                       | N/A | N/A | Correlation with PT value (r=0.56) N//S | N/A | N/A | N/A                 | N/A                | N/A                    | N/A                                                                              | N/A | N/A |
| Kyriakou [156] | In vivo/<br>NATEM                          | 40 NVAf vs 20 controls   | Rivaroxaban (20 mg) (n. 20 patients)   | N/A                       | N/A | N/A | N/A                                     | N/A | N/A | 916±414 vs 499±116* | 310±265 vs 133±31* | 59.9±6.2 vs 58.8±4 N/S | N/A                                                                              | N/A | N/A |
|                |                                            |                          | Apixaban (5 mg b.i.d) (n. 20 patients) | N/A                       | N/A | N/A | N/A                                     | N/A | N/A | 750±150 vs 499±116* | 232±128 vs 133±31# | 60.2±7.6 vs 58.8±4 N/S | N/A                                                                              | N/A | N/A |

|                  |                       |                       |                                                          |                                 |                     |                     |                                                                                                                              |                      |                  |     |     |     |     |     |     |
|------------------|-----------------------|-----------------------|----------------------------------------------------------|---------------------------------|---------------------|---------------------|------------------------------------------------------------------------------------------------------------------------------|----------------------|------------------|-----|-----|-----|-----|-----|-----|
| Schenk [157]     | Ex vivo/ ROTEM gamma  | 13 healthy volunteers | Rivaroxaban (15 mg or 20 mg, before vs 3 hours after OA) | Correlation with PT (r=-0.740)§ | N/A                 | N/A                 | 68±6 vs 425±146§<br>Correlation with PT (r=-0.747)§                                                                          | N/A                  | N/A              | N/A | N/A | N/A | N/A | N/A | N/A |
| Casutt [158]     | Ex vivo               | 11 healthy volunteers | Rivaroxaban (10 mg, before vs 2.5 hours after OA)        | 194±26 vs 239±43§               | 86±11 vs 87±16 N/S  | 56±2 vs 54±60 N/S   | 58±9 vs 87±17#                                                                                                               | 113±30 vs 87±20 #    | 57±5 vs 57±4 N/S | N/A | N/A | N/A | N/A | N/A | N/A |
| Chojnowski [159] | In vivo               | 13 VTE patients       | Rivaroxaban (20 mg, before vs 2.5 hours after OA)        | 200.5±58.1 vs 272.1±133.8*      | N/A                 | N/A                 | 77.2±45.4 vs 178.5±118.5*                                                                                                    | N/A                  | N/A              | N/A | N/A | N/A | N/A | N/A | N/A |
| Fontana [163]    | Ex-vivo/ ROTEM delta  | 20 healthy volunteers | Rivaroxaban (20 mg, before vs 3 hours after OA)          | 56.1 (41.8, 70.3)°              | 2.8 (-3.2, 8.7) N/S | -0.5 (1.3, 0.4) N/S | 47.5 (37.8,-57.1)°                                                                                                           | -17.3 (-22.8,-11.7)° | 2.2 (1.3, 3.1)*  | N/A | N/A | N/A | N/A | N/A | N/A |
| Havrdova [164]   | In vitro/ ROTEM delta | 15 healthy volunteers | Edoxaban (60 mg)                                         | N/A                             | N/A                 | N/A                 | Correlation with plasma concentration on 2 hours (r=0.90)*, 4 hours (r=0.84)*, 6 hours (r=0.77)*, 8 hours after OA (r=0.52)§ | N/A                  | N/S              | N/A | N/A | N/A | N/A | N/A | N/A |

Legend: OA: oral administration; b.i.d= bis in die; CFT: clot formation time; CT: clotting time; ECATEM: ecarin-activated assay; ICU: intensive care unit; LMWH: low molecular weight heparin; MCF: maximum clot formation; N/A = not analyzed; NATEM: nonactivated thromboelastometry; N/S = not significant; NVAf: non valvular atrial fibrillation; PT: prothrombin time; PiCT: prothrombinase-induced clotting time; ROTEM = rotational thromboelastometry; TF: tissue factor; VTE: venous thromboembolism

\*p<0.001

§p<0.05

°p<0.0001

#p<0.01
