# Supplementary material for: “In Less than No Time”: Feasibility of Rotational Thromboelastometry to Detect Anticoagulant Drugs Activity and to Guide Reversal Therapy
Source: MDPI journal article supplement (doi:10.3390/jcm11051407), 2022-03-04
Supplement: s1 [file s1]

| Study                | Type of study/<br>ROTEM              | N. patients                                                                            | Type of drug        | INR (Owen PT)    | INTEM-CT                        | INTEM-CFT | INTEM-MCF                | EXTEM-CT                                                                                                                                                                                                                                                                                                                                                               | EXTEM-CFT | EXTEM-MCF                | Correlation                                                                                 |
|----------------------|--------------------------------------|----------------------------------------------------------------------------------------|---------------------|------------------|---------------------------------|-----------|--------------------------|------------------------------------------------------------------------------------------------------------------------------------------------------------------------------------------------------------------------------------------------------------------------------------------------------------------------------------------------------------------------|-----------|--------------------------|---------------------------------------------------------------------------------------------|
| Schmidt [119]        | Prospective clinical/<br>ROTEM delta | 111 anticoagulated patients vs 89 healthy volunteers                                   | Warfarin vs control | 2.4 (1.9-2.9)    | 176 (162-191) vs 163 (157-170)* | N/A       | 69.4±4.1 vs 65.5±7.0 N/S | 98 (83-120) vs 47 (44-51)*                                                                                                                                                                                                                                                                                                                                             | N/A       | 68.6±4.6 vs 64.4±4.6 N/S | N/A                                                                                         |
| Schmidt [120]        | Prospective clinical/<br>ROTEM delta | 84 with VTE vs 87 healthy volunteers                                                   | Warfarin vs control | 2.35 (1.9-2.73)  | N/A                             | N/A       | N/A                      | N/A                                                                                                                                                                                                                                                                                                                                                                    | N/A       | N/A                      | Lag time/EXTEM-CT (r=0.87)°                                                                 |
| Blasi [127]          | Prospective clinical/<br>ROTEM delta | 54 consecutive patients on oral anticoagulation after elective heart valve replacement | Acenocoumarol       | 2.05 (1.30-2.44) | N/A                             | N/A       | N/A                      | EXTEM-CT correlated at best with INR (r=0.81)°. EXTEM CT was able to predict INR values above or below 1.5: ROC AUC = 0.998. EXTEM-CT ≥ 84 s had a sensitivity and specificity of 100% and 80%, respectively, to detect an INR below 1.5. For the same INR threshold, CT ≥ 84 seconds had a predictive positive value of 92.9% and a predictive negative value of 100% | N/A       | N/A                      | INR/EXTEM-CT (r=0.81)°                                                                      |
| Nilsson [121]        | Prospective clinical                 | 80 anticoagulated                                                                      | Warfarin            | 2.4 (1.9-3.4)    | N/A                             | N/A       | N/A                      | N/A                                                                                                                                                                                                                                                                                                                                                                    | N/A       | N/A                      | Owen PT/EXTEM-CT (r=0.66)°<br>Owen PT/INTEM-CT (r=0.26) N/S<br>Owen PT/FIBTEM-CT (r= 0.66)° |
| Gudmundsdottir [122] | In vitro                             | 20 healthy donors                                                                      | Warfarin            | N/A              | N/A                             | N/A       | N/A                      | N/A                                                                                                                                                                                                                                                                                                                                                                    | N/A       | N/A                      | Owen PT/ROTEM-CT (r= 0.2) N/S                                                               |

Legend: AF: atrial fibrillation; CT: clotting time; CFT: clot formation time; ICU: intensive care unit; INR: international normalized ratio; MCF: maximum clot firmness; N/S = not significant; N/A = not analyzed; PT: prothrombin time; ROC AUC: Receiver Operating Characteristic Area Under Curve; ROTEM: rotational thromboelastometry; VTE: venous thromboembolism

\*p<0.001

°p<0.0001
