# Supplementary material for: “In Less than No Time”: Feasibility of Rotational Thromboelastometry to Detect Anticoagulant Drugs Activity and to Guide Reversal Therapy
Source: MDPI journal article supplement (doi:10.3390/jcm11051407), 2022-03-04
Supplement: s1 [file s1]

| Study                 | Type of study/<br>ROTEM           | N. patients                                | Type of drug             | Drug concentration or dose/<br>intervention                                                                         | INTEM-CT                                                                                                                      | INTEM-CFT                                                                                        | INTEM-MCF                                                                                      | EXTEM-CT                                                                                                                     | EXTEM-CFT                                                                                      | EXTEM-MCF                                                                                        |
|-----------------------|-----------------------------------|--------------------------------------------|--------------------------|---------------------------------------------------------------------------------------------------------------------|-------------------------------------------------------------------------------------------------------------------------------|--------------------------------------------------------------------------------------------------|------------------------------------------------------------------------------------------------|------------------------------------------------------------------------------------------------------------------------------|------------------------------------------------------------------------------------------------|--------------------------------------------------------------------------------------------------|
| Thomas [69]           | In vitro                          | 10 surgical patients                       | Enoxaparin vs Tinzaparin | 0.5 IU/mL; 1.0 IU/mL; 1.5 IU/mL<br>0.5 IU/mL; 1.0 IU/mL; 1.5 IU/mL                                                  | 191±8 N/S; 214±109 N/S; 249±94*<br>223±53 N/S; 289±84 N/S; 326±125*                                                           | 87±21 N/S; 85±16 N/S; 82±22§<br>74±27 N/S; 84±85 N/S; 80±21§                                     | 61±7; 63±5; 63±6<br>68±7; 64±8; 65±6                                                           | N/A                                                                                                                          | N/A                                                                                            | N/A                                                                                              |
| Feuring [72]          | In vitro                          | 16 healthy volunteers                      | Dalteparin vs baseline   | 0.01 µg/mL; 0.1 µg/mL<br>1 µg/mL; 10 µg/mL                                                                          | 126±17 N/S; 185±136 N/S<br>314±167°; 614±75°                                                                                  | 74.8±17.4 N/S; 102±83 N/S<br>120±60 N/S; 251±76°                                                 | 59.9±4.4 N/S; 57.8±8.0 N/S; 55.9±9.5 N/S; 47.9±5.8°                                            | N/A; N/A<br>173±112°; 332±201°                                                                                               | N/A; N/A;<br>N/A; 188±115°                                                                     | N/A; N/A;<br>N/A; 51.7±18.4                                                                      |
| Cvirm [74]            | In vitro                          | 63 healthy volunteers                      | Nadropin                 | 0 IU/mL; 0.1 IU/mL; 0.2 IU/mL; 0.3 IU/mL; 0.4 IU/mL; 0.5 IU/mL; 0.6 IU/mL; 0.7 IU/mL; 0.8 IU/mL; 0.9 IU/mL; 1 IU/mL | Dose-dependent prolongation (assay not specified)                                                                             | Dose-dependent prolongation (assay not specified)                                                | N/A                                                                                            | N/A                                                                                                                          | N/A                                                                                            | N/A                                                                                              |
|                       |                                   |                                            | Enoxaparin               | 0 IU/mL; 0.1 IU/mL; 0.2 IU/mL; 0.3 IU/mL; 0.4 IU/mL; 0.5 IU/mL; 0.6 IU/mL; 0.7 IU/mL; 0.8 IU/mL; 0.9 IU/mL; 1 IU/mL | Dose-dependent prolongation (assay not specified)                                                                             | Dose-dependent prolongation (assay not specified)                                                | N/A                                                                                            | N/A                                                                                                                          | N/A                                                                                            | N/A                                                                                              |
| Jilma-Stohlawetz [75] | In vitro/ NATEM                   | 15 healthy volunteers                      | Enoxaparin               | 0 IU/mL; 0.1 IU/mL; 0.2 IU/mL; 0.4 IU/mL                                                                            | N/A; N/A; prolonged by 70%<br>prolonged by 140%#                                                                              | N/A; N/A; prolonged by 200%<br>prolonged by 130% #                                               | N/A                                                                                            | N/A                                                                                                                          | N/A                                                                                            | N/A                                                                                              |
| Christensen [76]      | Prospective clinical              | 63 cancer patients                         | Dalteparin vs no LMWH    | Preoperative<br>Perioperative<br>First postoperative day<br>Second postoperative day                                | 165 (161-175) vs 165 (161-176) N/S<br>170 (150-173) vs 169 (162-177) N/S<br>167 (19) vs 156 (14)#<br>166 (15) vs 156 (15) N/S | N/A                                                                                              | N/A                                                                                            | 58 (54-61) vs 59 (54-65) N/S<br>56 (52-58) vs 55 (53-64) N/S<br>58 (55-60) vs 59 (52-63) N/S<br>59 (55-62) vs 58 (53-67) N/S | N/A                                                                                            | N/A                                                                                              |
| Stanciakov a [77]     | Prospective clinical/ ROTEM delta | 46 pregnant women                          | LMWH, not specified      | Optimization secondary thromboprophylaxis vs controls                                                               | N/S                                                                                                                           | 88 (73-111) § (10 <sup>th</sup> gestation week)<br>58 (54-68)# (35 <sup>th</sup> gestation week) | 67 (64-70)* (26 <sup>th</sup> gestation week)<br>68 (65-71)* (35 <sup>th</sup> gestation week) | N/S                                                                                                                          | 61 (55-67)* (26 <sup>th</sup> gestation week)<br>63 (58-69)# (35 <sup>th</sup> gestation week) | 69 (66-72)* (26 <sup>th</sup> gestation week)<br>70 (66.5-72)* (35 <sup>th</sup> gestation week) |
| Konstantini dis [83]  | Prospective clinical              | 60 patients undergoing carotid angioplasty | Nadroparin vs no LMWH    | Dose: 5750 IU s.c. twice daily                                                                                      | 185±63 vs 148±40§                                                                                                             | 63±17 vs 52±10 N/S                                                                               | 66±6 vs 66±4 N/S                                                                               | N/A                                                                                                                          | N/A                                                                                            | N/A                                                                                              |

|                      |                                    |                                                |                       |                                                                                                                                          |                                                                                                                                                                                                                                                                |                                 |                          |                                                                                                                                               |                          |                          |
|----------------------|------------------------------------|------------------------------------------------|-----------------------|------------------------------------------------------------------------------------------------------------------------------------------|----------------------------------------------------------------------------------------------------------------------------------------------------------------------------------------------------------------------------------------------------------------|---------------------------------|--------------------------|-----------------------------------------------------------------------------------------------------------------------------------------------|--------------------------|--------------------------|
| Konstantini dis [83] | Prospective clinical/ Low TF-ROTEM | 60 patients undergoing carotid angioplasty     | Nadroparin vs no LMWH | Dose: 5750 IU s.c. twice daily                                                                                                           | 380±96 vs 293±57§                                                                                                                                                                                                                                              | 123±51 vs 86±15 §               | 64±10 vs 68±13 N/S       | N/A                                                                                                                                           | N/A                      | N/A                      |
| Ölander [84]         | In vitro                           | 10 ICU patients                                | Enoxaparin vs no LMWH | 0.2 IU/mL<br>0.4 IU/mL<br>0.6 IU/mL                                                                                                      | N/S<br>Prolonged§<br>Prolonged*                                                                                                                                                                                                                                | N/S<br>Prolonged#<br>Prolonged§ | N/A<br>N/A<br>N/A        | N/A<br>N/A<br>N/A                                                                                                                             | N/A<br>N/A<br>N/A        | N/A<br>N/A<br>N/A        |
| Ölander [84]         | In vitro/ NATEM test               | 10 ICU patients                                | Enoxaparin vs no LMWH | 0.2 IU/mL<br>0.4 IU/mL<br>0.6 IU/mL                                                                                                      | N/S<br>Prolonged§<br>Prolonged°                                                                                                                                                                                                                                | N/S<br>N/S<br>Prolonged§        | N/A<br>N/A<br>N/A        | N/A<br>N/A<br>N/A                                                                                                                             | N/A<br>N/A<br>N/A        | N/A<br>N/A<br>N/A        |
| Schaden [66]         | In vitro/ PiCT-ROTEM Low TF-ROTEM  | 16 healthy volunteers                          | Enoxaparin            | 16 LMWH concentration from 0 to 1 IU/mL<br>16 LMWH concentrations from 0 to 1 IU/mL                                                      | Linear dependency with drug concentration#<br>Linear dependency with drug concentration#                                                                                                                                                                       | N/A<br>N/A                      | N/A<br>N/A               | N/A<br>N/A                                                                                                                                    | N/A<br>N/A               | N/A<br>N/A               |
| Eller [90]           | In vitro                           | 2 healthy volunteers                           | Fondaparinux          | 250 µg/mL (supratherapeutic)                                                                                                             | 470±59.8#                                                                                                                                                                                                                                                      | N/A                             | N/A                      | N/S                                                                                                                                           | N/A                      | N/A                      |
| Engstrom [102]       | In vitro                           | 10 healthy volunteers                          | Argatroban            | 0 mg/L; 0.125 mg/L; 0.5 mg/L; 1 mg/L<br>2 mg/L; 4 mg/L; 8 mg/L                                                                           | Strong correlation with drug concentration°                                                                                                                                                                                                                    | N/A                             | N/A                      | N/A                                                                                                                                           | N/A                      | N/A                      |
| Schaden [103]        | In vitro/ ECATEM                   | 6 healthy volunteers                           | Argatroban            | 0 mg/L; 0.10 mg/L; 0.25 mg/L; 0.40 mg/L; 0.50 mg/L; 0.60 mg/L; 0.75 mg/L; 1.0 mg/L; 2.0 mg/L                                             | N/A                                                                                                                                                                                                                                                            | N/A                             | N/A                      | ECATEM CT; strong correlation with drug concentration (r = 0.94)#                                                                             | N/A                      | N/A                      |
| Beiderlinden [104]   | Prospective clinical               | 17 ICU patients                                | Argatroban            | 0.5 µg/Kg/min (without liver dysfunction)<br>0.25 µg/Kg/min (with liver dysfunction)<br><br>12 hours<br>24 hours<br>48 hours<br>72 hours | ↑ (compared to baseline)"<br>↑ (compared to baseline)"<br>↑ (compared to baseline)"<br>↑ (compared to baseline)"                                                                                                                                               | N/A<br>N/A<br>N/A<br>N/A        | N/A<br>N/A<br>N/A<br>N/A | ↑ (compared to baseline)"<br>↑ (compared to baseline)"<br>↑ (compared to baseline)"<br>↑ (compared to baseline)"<br>↑ (compared to baseline)" | N/A<br>N/A<br>N/A<br>N/A | N/A<br>N/A<br>N/A<br>N/A |
| Eller [90]           | In vitro                           | 19 healthy volunteers                          | Argatroban            | 0.75-2.25 µg/mL                                                                                                                          | ↑ (compared to baseline) §                                                                                                                                                                                                                                     | N/A                             | N/A                      | ↑ (compared to baseline) §                                                                                                                    | N/A                      | N/A                      |
| Teruya [107]         | Retrospective clinical             | 18 children on ECMO or VAD (106 blood samples) | Bivalirudin           | 0.33 ± 0.21 µg/kg/h continuous infusion as maintenance dose                                                                              | 276 ± 61 s correlated to an aPTT of 68 ± 14.8 (r = 0.54)*; both are impacted by HLE detected in 39% of specimens; therefore, improved correlation in specimens without HLE (r = 0.68 ° and between HEPTEM CT (260 ± 50 s) and HPTT (61.5 ± 10.8 s) (r = 0.69)° | N/A                             | N/A                      | 109 ± 40 s correlated to a PT of 19.5 ± 2.6 s (r = 0.37)*                                                                                     | N/A                      | N/A                      |

Legend: aPTT: activated partial thromboplastin time; CT: clotting time; CFT: clot formation time; ECATEM: ecarin-activated assay; ECMO: extracorporeal membrane oxygenation; HLE: endogenous heparin-like effects; HPTT: aPTT Hepzyme; ICU: intensive care unit; iv: intravenous; LMWH: low molecular weight heparin; MCF: maximum clot firmness; N/A = not analyzed; N/S = not significant; PiCT: prothrombinase- induced clotting time; PT: prothrombin time; ROTEM: rotational thromboelastometry; TF: tissue factor; VAD: ventricular assisted device; ↑: increased

\*p<0.001

§p<0.05

°p<0.0001

#p<0.01

"p<0.0125
